# Supplementary material
Source: HighWire-hosted journal article supplement (https://erj.ersjournals.com/content/58/4/2002819)
Supplement: inline-supplementary-material-2 [file inline-supplementary-material-2.pdf]

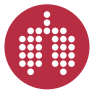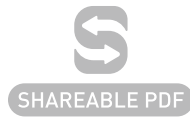

# The early use of Antibiotics for at Risk Children with Influenza-like illness (ARCHIE): a double-blind randomised placebo-controlled trial

Kay Wang<sup>1</sup>, Malcolm G. Semple<sup>1,2,3</sup>, Michael Moore<sup>4</sup>, Alastair D. Hay<sup>5</sup>, Sharon Tonner<sup>1</sup>, Ushma Galal<sup>1</sup>, Jenna Grabey<sup>1</sup>, Tricia Carver<sup>1</sup>, Rafael Perera<sup>1</sup>, Ly-Mee Yu<sup>1</sup>, Jill Mollison<sup>1</sup>, Paul Little<sup>3</sup>, Andrew Farmer<sup>1</sup>, Christopher C. Butler<sup>1</sup> and Anthony Harnden<sup>1</sup>

<sup>1</sup>Nuffield Department of Primary Care Health Sciences, University of Oxford, Radcliffe Primary Care, Oxford, UK. <sup>2</sup>NIHR Health Protection Research Unit in Emerging and Zoonotic Infections, Institute of Infection, Veterinary and Ecological Sciences, University of Liverpool, Liverpool, UK. <sup>3</sup>Dept of Respiratory Medicine, Alder Hey Children's Hospital, Liverpool, UK. <sup>4</sup>Academic Unit, Primary Care and Population Sciences, University of Southampton, Aldermoor Health Centre, Southampton, UK. <sup>5</sup>Centre for Academic Primary Care, Population Health Sciences, Bristol Medical School, Bristol, UK.

Corresponding author: Kay Wang ([kay.wang@phc.ox.ac.uk](mailto:kay.wang@phc.ox.ac.uk))

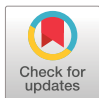

Shareable abstract (@ERSpublications)

**This trial did not find evidence that early co-amoxiclav use reduces reconsultation due to clinical deterioration in “at risk” children who present with influenza-like illness during influenza season**  
<https://bit.ly/3stZwnn>

**Cite this article as:** Wang K, Semple MG, Moore M, *et al.* The early use of Antibiotics for at Risk Children with Influenza-like illness (ARCHIE): a double-blind randomised placebo-controlled trial. *Eur Respir J* 2021; 58: 2002819 [DOI: 10.1183/13993003.02819-2020].

This single-page version can be shared freely online.

Copyright ©The authors 2021. For reproduction rights and permissions contact [permissions@ersnet.org](mailto:permissions@ersnet.org)

This article has supplementary material available from [erj.ersjournals.com](http://erj.ersjournals.com)

Received: 17 July 2020  
Accepted: 18 Feb 2021

## Abstract

**Introduction** The UK government stockpiles co-amoxiclav to treat bacterial complications during influenza pandemics. This pragmatic trial examines whether early co-amoxiclav use reduces reconsultation due to clinical deterioration in “at risk” children presenting with influenza-like illness (ILI) in primary or ambulatory care.

**Methods** “At risk” children aged from 6 months to 12 years presenting within 5 days of ILI onset were randomly assigned to oral co-amoxiclav 400/57 or a placebo twice daily for 5 days (dosing based on age±weight). “At risk” groups included children with respiratory, cardiac and neurological conditions. Randomisation was stratified by region and used a non-deterministic minimisation algorithm to balance age and current seasonal influenza vaccination status. Our target sample size was 650 children which would have allowed us to detect a reduction in the proportion of children reconsulting due to clinical deterioration from 40% to 26%, with 90% power and 5% two-tailed alpha error (including allowance for 25% loss to follow-up and an inflation factor of 1.041). Participants, caregivers and investigators were blinded to treatment allocation. Intention-to-treat analysis included all randomised participants with primary outcome data on reconsultation due to clinical deterioration within 28 days. Safety analysis included all randomised participants. Trial registration: ISRCTN 70714783. EudraCT 2013-002822-21.

**Results** We recruited 271 children between February 11, 2015 and April 20, 2018. Primary outcome data were available for 265 children. Only 61 out of 265 children (23.0%) reconsulted due to clinical deterioration. No evidence of a treatment effect was observed for reconsultation due to clinical deterioration (33 out of 133 for co-amoxiclav (24.8%) and 28 out of 132 (21.2%) for placebo; adjusted risk ratio (RR) 1.16, 95% confidence interval (CI) 0.75–1.80). There was also no evidence of a difference between groups in the proportion of children for whom one or more adverse events (AEs) were reported (32 out of 136 (23.5%) for co-amoxiclav and 22 out of 135 (16.3%) for placebo; adjusted RR 1.45, 95% CI 0.90–2.34). In total, 66 AEs were reported (co-amoxiclav, n=37; placebo, n=29). Nine serious AEs were reported per group, although none were considered related to study medication.

**Conclusion** Our trial did not find evidence that treatment with co-amoxiclav reduces risk of reconsultation due to clinical deterioration in “at risk” children who present early with ILI during influenza season. Our findings therefore do not support early co-amoxiclav use in children with seasonal ILI.
